# Supplementary material for: Trichoderma atroviride Enhances Impatiens walleriana Hook. f Growth and Flowering in Different Growing Media
Source: MDPI journal article supplement (doi:10.3390/plants13050583), 2024-02-21
Supplement: s1 [file s1]

## Supplementary data

### *Trichoderma atroviride* enhances *Impatiens walleriana* Hook. f growth and flowering in different growing media

Silvia Traversari<sup>1,2</sup>, Mariateresa Cardarelli<sup>3\*</sup>, Massimo Brambilla<sup>4</sup>, Maurizio Cutini<sup>4</sup>, Gianluca Burchi<sup>5</sup>, Marco Fedrizzi<sup>6</sup>, Daniele Massa<sup>5</sup>, Alessandro Orlandini<sup>6,7</sup>, Sonia Cacini<sup>5</sup>

**Table S1** Biometric parameters of *I. walleriana* plants at the end of the experiment.

| Source of variation           | Flower DW<br>(g plant <sup>-1</sup> ) | SLA<br>(cm <sup>2</sup> g DW <sup>-1</sup> ) | Root/Shoot   |
|-------------------------------|---------------------------------------|----------------------------------------------|--------------|
| <u>Treatment (T)</u>          |                                       |                                              |              |
| No <i>T. atroviride</i> (NTA) | 0.87 ± 0.278                          | 565 ± 83.8                                   | 0.24 ± 0.045 |
| <i>T. atroviride</i> (TA)     | 1.08 ± 0.121                          | 606 ± 74.5                                   | 0.23 ± 0.034 |
| <i>P</i> -value               | ns                                    | ns                                           | ns           |
| <u>Substrate (S)</u>          |                                       |                                              |              |
| Peat (P)                      | 1.03 ± 0.190                          | 565 ± 95.9                                   | 0.25 ± 0.047 |
| Coir (C)                      | 0.92 ± 0.273                          | 606 ± 58.6                                   | 0.22 ± 0.022 |
| <i>P</i> -value               | ns                                    | ns                                           | ns           |
| <u>T × S</u>                  |                                       |                                              |              |
| NTA × P                       | 0.97 ± 0.243                          | 553 ± 121.7                                  | 0.27 ± 0.045 |
| NTA × C                       | 0.77 ± 0.309                          | 576 ± 34.8                                   | 0.22 ± 0.030 |
| TA × P                        | 1.09 ± 0.125                          | 577 ± 79.0                                   | 0.23 ± 0.048 |
| TA × C                        | 1.07 ± 0.136                          | 636 ± 66.4                                   | 0.22 ± 0.014 |
| <i>P</i> -value               | ns                                    | ns                                           | ns           |

Values represent the means (n = 4) ± SD. Two-way ANOVA *P*-values are reported in the table (ns = not significant). DW = dry weight, SLA = specific leaf area.

**Table S2** Nutrient concentrations (g kg<sup>-1</sup> DW) measured in *I. walleriana* roots at the end of the experiment.

| Source of variation           | TKN         | P-PO <sub>4</sub> | K           | Ca          | Mg         |
|-------------------------------|-------------|-------------------|-------------|-------------|------------|
| <u>Treatment (T)</u>          |             |                   |             |             |            |
| No <i>T. atroviride</i> (NTA) | 14.8 ± 0.58 | 3.5 ± 0.36        | 11.8 ± 1.27 | 16.8 ± 0.85 | 3.6 ± 0.38 |
| <i>T. atroviride</i> (TA)     | 14.9 ± 0.75 | 3.9 ± 0.33        | 14.0 ± 1.45 | 17.8 ± 0.77 | 3.8 ± 0.25 |
| <i>P</i> -value               | ns          | ns                | *           | ns          | ns         |
| <u>Substrate (S)</u>          |             |                   |             |             |            |
| Peat (P)                      | 15.1 ± 0.83 | 3.7 ± 0.24        | 13.1 ± 1.66 | 17.2 ± 0.80 | 3.5 ± 0.28 |
| Coir (C)                      | 14.7 ± 0.36 | 3.8 ± 0.51        | 12.7 ± 1.92 | 17.5 ± 1.08 | 3.9 ± 0.25 |
| <i>P</i> -value               | ns          | ns                | ns          | ns          | *          |
| <u>T × S</u>                  |             |                   |             |             |            |
| NTA × P                       | 15.1 ± 0.72 | 3.5 ± 0.09        | 12.5 ± 1.31 | 16.9 ± 0.98 | 3.4 ± 0.33 |
| NTA × C                       | 14.6 ± 0.23 | 3.6 ± 0.54        | 11.2 ± 1.05 | 16.7 ± 0.89 | 3.8 ± 0.35 |
| TA × P                        | 15.0 ± 1.04 | 3.8 ± 0.22        | 13.7 ± 2.01 | 17.4 ± 0.71 | 3.6 ± 0.20 |
| TA × C                        | 14.8 ± 0.48 | 4.0 ± 0.42        | 14.3 ± 1.01 | 18.2 ± 0.70 | 4.0 ± 0.01 |
| <i>P</i> -value               | ns          | ns                | ns          | ns          | ns         |

Values represent the means (n = 4) ± SD. Two-way ANOVA *P*-values are reported in the table (\* *P* < 0.05; ns = not significant). TKN = total Kjeldahl nitrogen.
